# Supplementary material for: Designer lyotropic liquid-crystalline systems containing amino acid ionic liquids as self-organisation media of amphiphiles
Source: Royal Society of Chemistry journal article supplement (doi:10.1039/c3cc45429k), 2013-01-01
Supplement: c3cc45429k.pdf [file c3cc45429k.pdf]

## Supporting Information for

# Designer lyotropic liquid-crystalline systems containing amino acid ionic liquids as self-organization media of amphiphiles

Takahiro Ichikawa,<sup>a,b</sup> Kanae Fujimura,<sup>a,b</sup> Masafumi Yoshio,<sup>c</sup> Takashi Kato<sup>c</sup> and Hiroyuki Ohno<sup>\*a,b</sup>

## 1. General Procedures and Materials

**General Procedures.** <sup>1</sup>H NMR and <sup>13</sup>C NMR spectra were obtained on a JEOL JNM-ECX400 at 400 and 100 MHz in DMSO, respectively. Chemical shifts of <sup>1</sup>H and <sup>13</sup>C NMR signals were quoted to (CH<sub>3</sub>)<sub>4</sub>Si ( $\delta = 0.00$ ) and DMSO ( $\delta = 39.5$ ) as internal standards, respectively. Elemental analyses were carried out on an Elementar Analytical vario EL3. The viscosity of amino acid ionic liquids was measured by a cone/plate viscometer (LV DV-1+, Brookfield). The thermal properties of amino acid ionic liquids were measured using a differential scanning calorimeter (DSC-6220, Seiko Instruments). The thermal properties of the liquid-crystalline mixtures were examined by a DSC using a Netzsch DSC204 *Phoenix*. The heating and cooling rates were 5 °C min<sup>-1</sup>. A polarizing optical microscope Olympus BX51 equipped with a Linkam LK-600 hot stage was used for visual observation. Wide-angle X-ray diffraction (WAXD) patterns were obtained using a Rigaku RINT-2500 diffractometer with CuK $\alpha$  radiation. Two-dimensional small-angle X-ray scattering (2D SAXS) patterns of the materials were also recorded using an image plate detector (R-AXIS DS3C).

**Materials.** All chemical reagents and solvents were obtained from commercial sources and used without purification. All reactions were carried out under an argon atmosphere in anhydrous solvents.

## 2. Synthesis

Four types of amino acid ionic liquids, [bmim][X] (X = Gly, Ala, and Leu), were prepared through neutralization of 1-butyl-3-methylimidazolium hydroxide with corresponding natural amino acids according to the literature.<sup>1</sup> Amphiphile **1** was synthesized according to the literature.<sup>2</sup>

### 3. Characterization of Amino Acid Ionic Liquids [bmim][X]

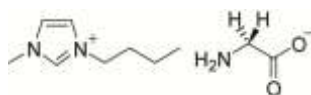

[bmim][Gly]

$^1\text{H-NMR}$  (400MHz, DMSO,  $\delta$ /ppm relative to TMS): 0.89 (3H, t,  $J = 4.6$  Hz), 1.24 (2H, m), 1.76 (2H, m), 2.72 (2H, s), 3.89 (3H, s), 4.20 (2H, t,  $J = 7.0$  Hz), 7.80 (1H, d,  $J = 1.8$  Hz), 7.86 (1H, d,  $J = 2.0$  Hz), 9.90 (1H, s),  $^{13}\text{C-NMR}$  (100 MHz, DMSO):  $\delta = 175.65, 138.10, 124.08, 122.76, 48.85, 47.05, 36.08, 31.95, 19.30, 13.79$ .

#### $^1\text{H-NMR}$ Spectrum

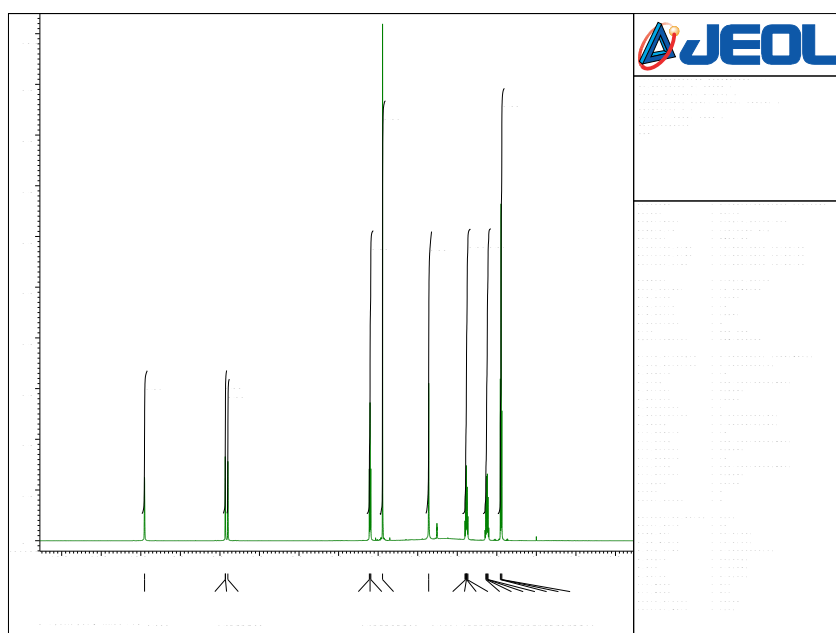

#### $^{13}\text{C-NMR}$ Spectrum

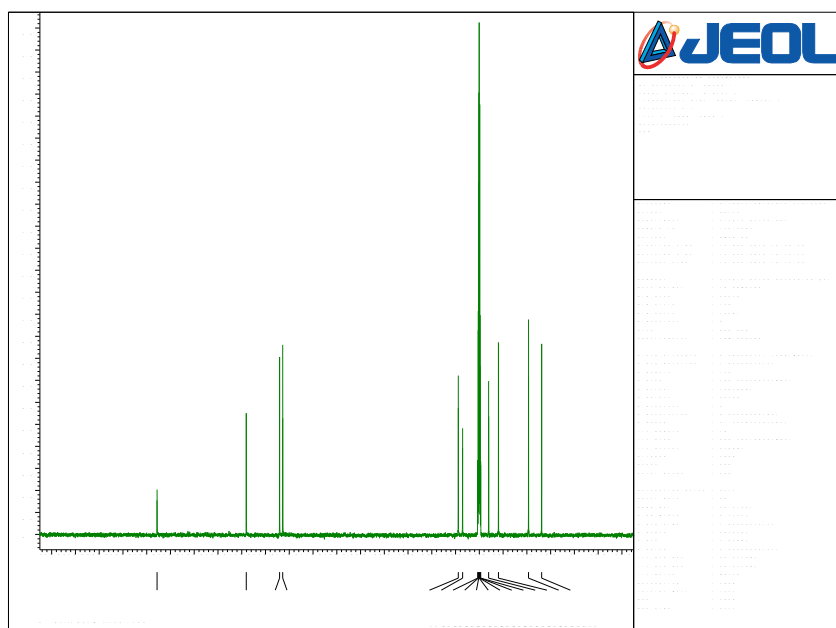

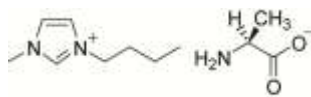

[bmim][Ala]

<sup>1</sup>H-NMR (400MHz, DMSO,  $\delta$ /ppm relative to TMS): 0.89 (3H, t,  $J = 7.4$  Hz), 1.02 (3H, d,  $J = 6.8$  Hz), 1.24 (2H, m), 1.77 (2H, m), 2.86 (1H, q,  $J = 6.8$  Hz), 3.90 (3H, s), 4.21 (2H, t,  $J = 7.4$  Hz), 7.82 (1H, s), 7.88 (1H, s), 10.04(1H, s). <sup>13</sup>C-NMR (100 MHz, DMSO):  $\delta$ = 178.67, 138.32, 124.08, 122.76, 52.44, 48.82, 36.05, 31.97, 23.57, 19.31, 13.80.

### <sup>1</sup>H-NMR Spetcrum

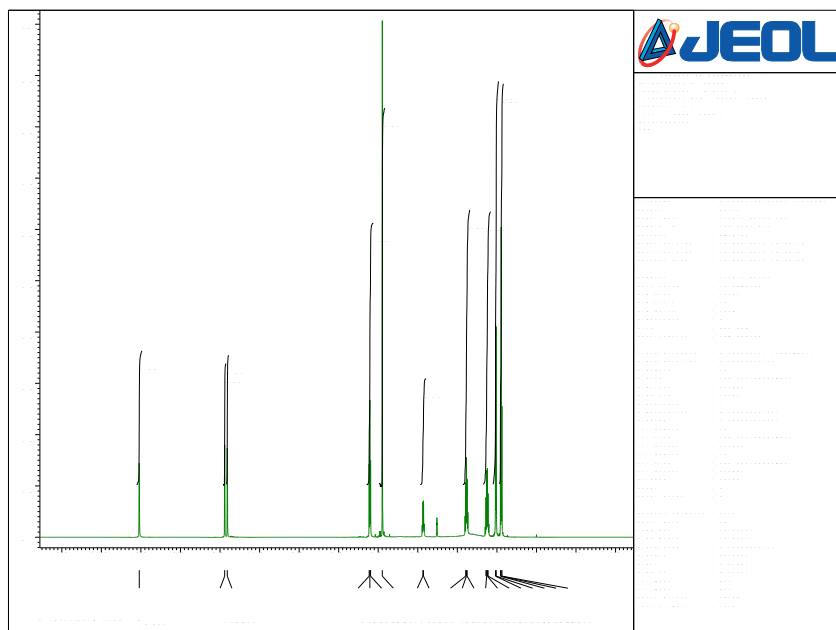

### <sup>13</sup>C-NMR Spetcrum

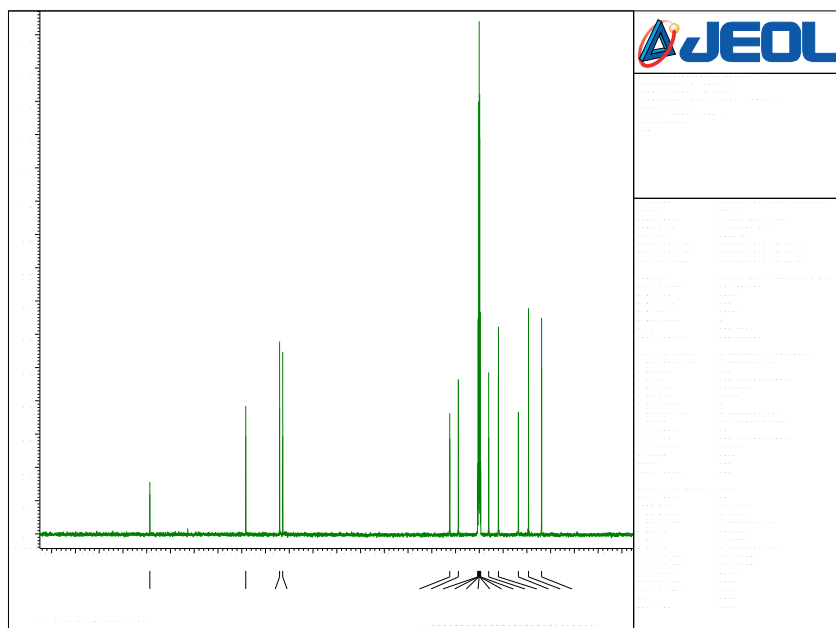

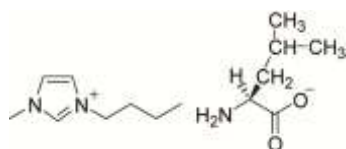

[bmim][Leu]

<sup>1</sup>H-NMR (400MHz, DMSO,  $\delta$ /ppm relative to TMS): 0.82 (6H, m), 0.90 (3H, t,  $J = 7.4$  Hz), 1.25 (2H, m), 1.41 (1H, m), 1.75 (4H, m), 2.51 (1H, m), 3.88 (3H, s), 4.19 (2H, t,  $J = 7.4$  Hz), 7.75 (1H, d,  $J = 0.8$  Hz), 7.82 (1H, d,  $J = 1.0$  Hz), 9.73 (1H, s). <sup>13</sup>C NMR (100 MHz, DMSO):  $\delta$ = 178.33, 137.93, 124.08, 122.74, 55.22, 48.90, 36.15, 31.95, 25.21, 24.29, 22.48, 19.32, 1382.

### <sup>1</sup>H-NMR Spetcrum

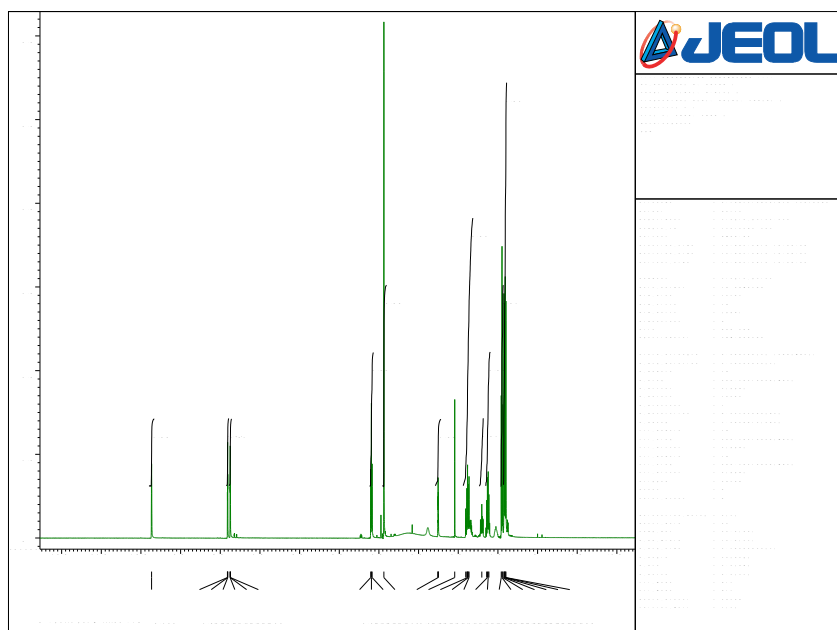

### <sup>13</sup>C-NMR Spetcrum

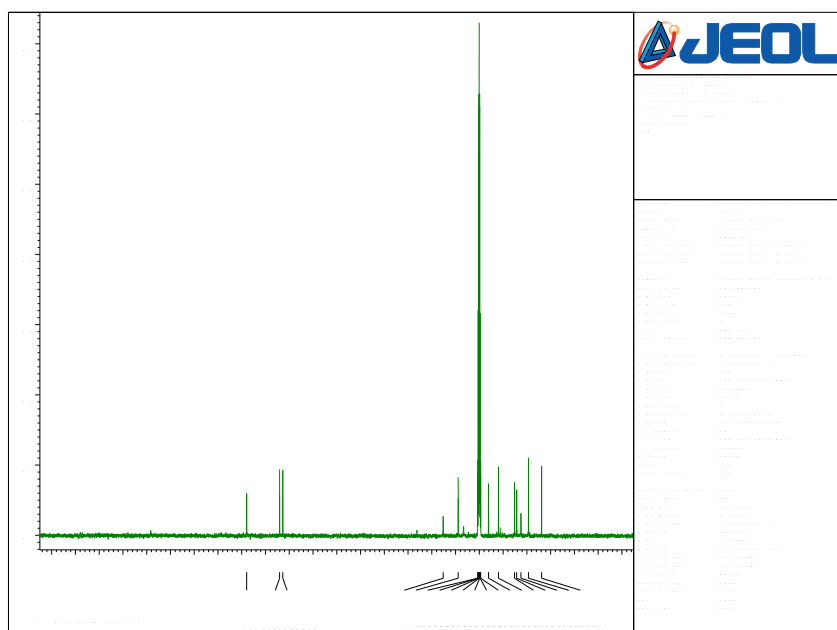

## 4. Measurement of Kamlet-Taft Parameters of [bmim][X]

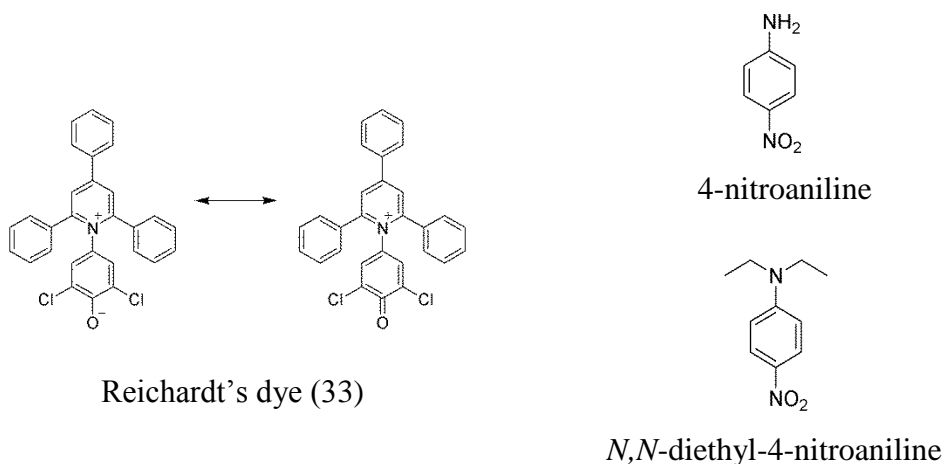

The Kamlet–Taft parameters of amino acid ionic liquids were examined as follows.

The solvatochromic dyes, (2,6-dichloro-4-(2,4,6-triphenyl-1-pyridinio)phenolate (Reichardt's dye 33) (from Fluka), 4-nitroaniline (from Tokyo Chemical Industries Co., Ltd), and *N,N*-diethyl-4-nitroaniline (from Kanto Chem.), were used as received.

To amino acid ionic liquid (0.2 mL), each dye was added as a concentrated dry dichloromethane solution. The dichloromethane was carefully removed by vacuum drying at 40 °C for 6 h. These dye solutions were placed into quartz cells with 1 mm light-path length. UV-vis absorption measurements were performed at 25 °C. By using the wavelength at the maximum absorption ( $\lambda_{\max}$ ), the  $\alpha$ ,  $\beta$  and  $\pi$  values were calculated by use of the following equations (1)-(4).

$$E_T(30) = 0.9986E_T(33) - 8.6878 \quad (1)$$

$$\pi^* = 8.649 - 0.314 \nu (NN)_{\max} \quad (2)$$

$$\beta = [1.035\nu (4N)_{\max} - \nu (NN)_{\max} + 2.64]/2.80 \quad (3)$$

$$\alpha = 0.0649E_T(30) - 0.72\pi^* - 2.03 \quad (4)$$

## 5. Thermotropic Liquid-Crystalline Property of Compound 1

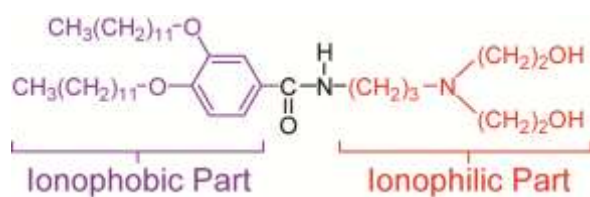

**1**

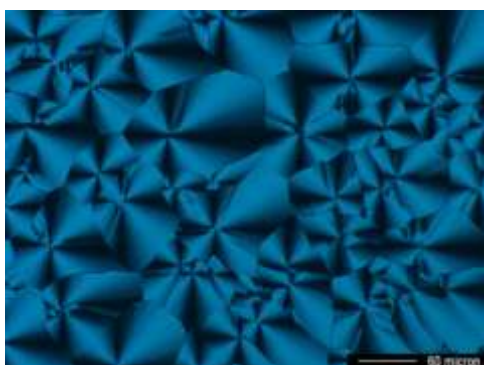

**Fig. S1** Polarizing optical image of **1** in a  $Col_h$  phase at 60 °C.

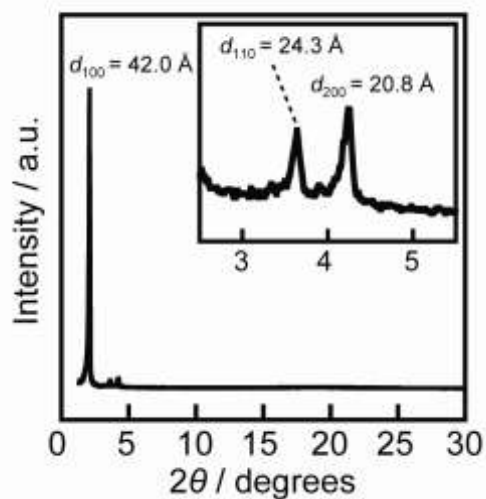

**Fig. S2** Wide angle X-ray diffraction pattern of **1** in a  $Col_h$  phase at 60 °C.

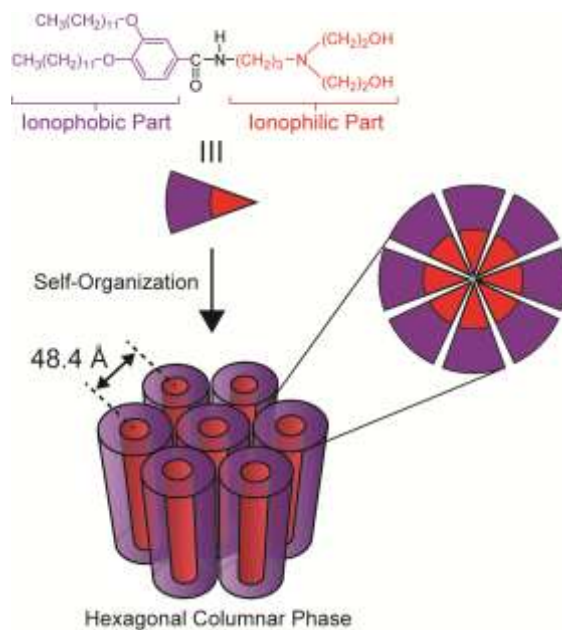

**Fig. S3** Schematic illustration for the nanosegregated  $Col_h$  structure formed by compound **1**.

## 6. Lyotropic Liquid-Crystalline Property of 1/[bmim][X] mixtures

### 1/[bmim][Gly] mixtures

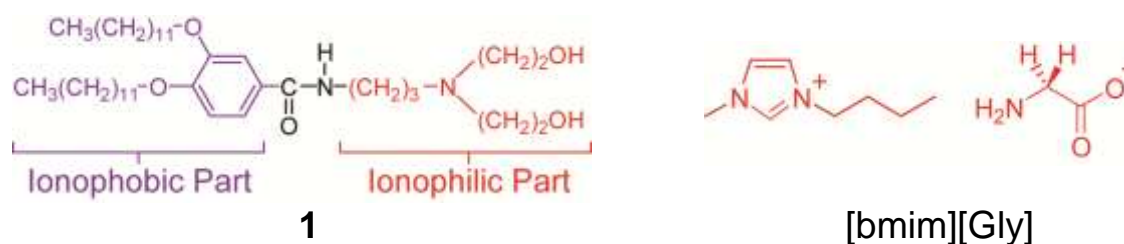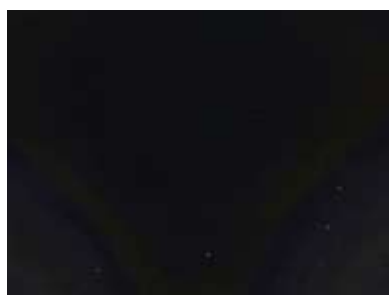

**Fig. S4** Polarizing optical images of 1/[bmim][Gly] in an 8:2 molar ratio in a Cub<sub>bi</sub> phase at 55 °C.

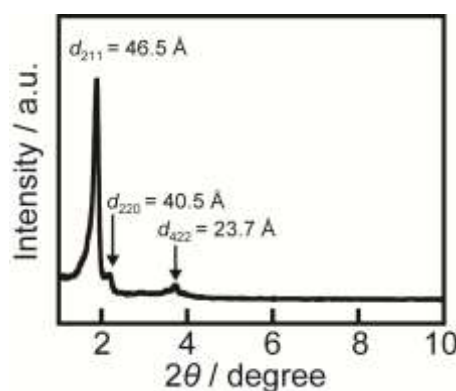

**Fig. S5** Wide angle X-ray diffraction pattern of 1/[bmim][Gly] in an 8:2 molar ratio in a Cub<sub>bi</sub> phase

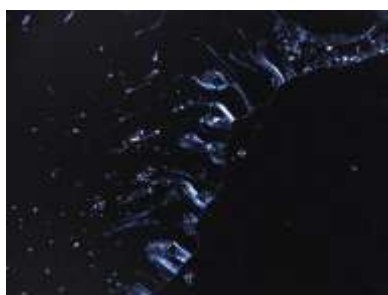

**Fig. S6** Polarizing optical images of 1/[bmim][Gly] in a 6:4 molar ratio in a Sm phase

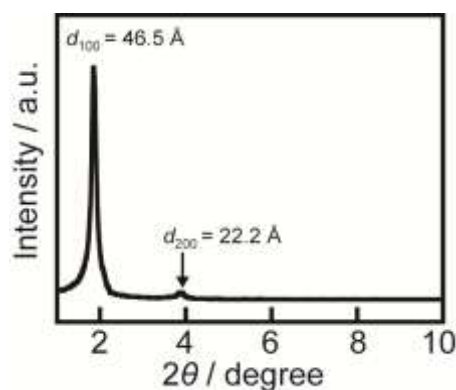

**Fig. S7** Wide angle X-ray diffraction pattern of 1/[bmim][Gly] in a 6:4 molar ratio in a Sm phase

### 1/[bmim][Ala] mixtures

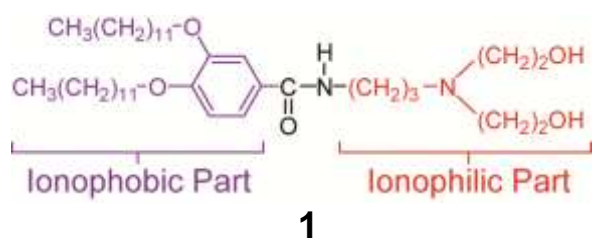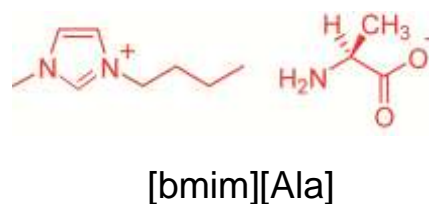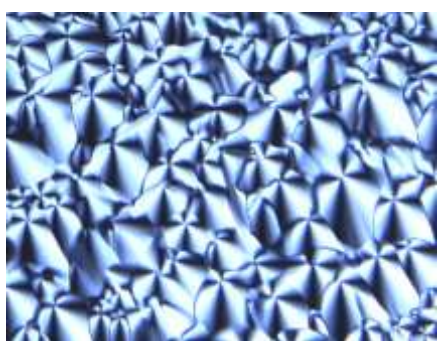

**Fig. S8** Polarizing optical image of **1**/[bmim][Ala] in a 9:1 molar ratio at 65 °C in a  $\text{Col}_h$  phase.

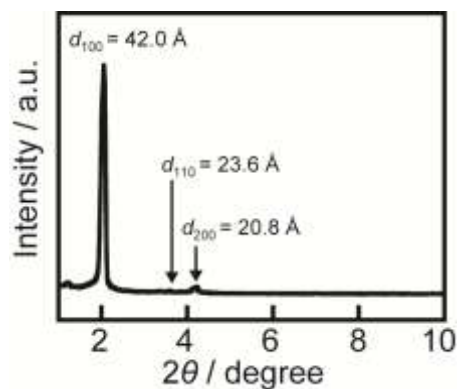

**Fig. S9** Wide angle X-ray diffraction pattern of **1**/[bmim][Ala] in a 9:1 molar ratio at 65 °C in a  $\text{Col}_h$  phase

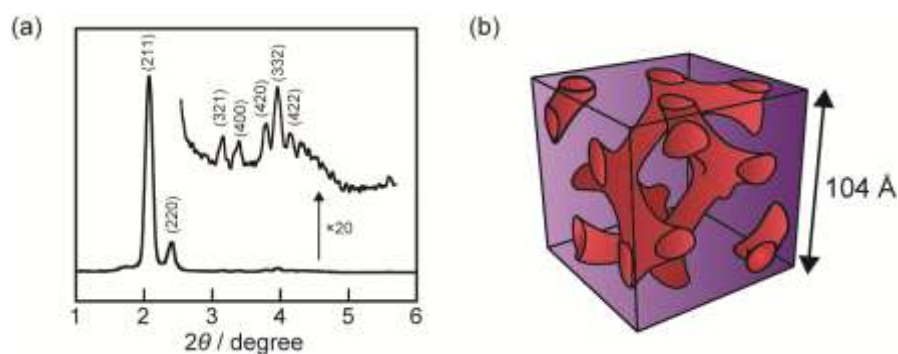

**Fig. S10** (a) Small-angle X-ray scattering pattern of **1**/[bmim][Ala] in an 8:2 molar ratio at 55 °C in a  $\text{Cub}_{bu}$  phase. (b) Schematic illustration of the  $\text{Cub}_{bu}$  phase having  $Ia3d$  symmetry.



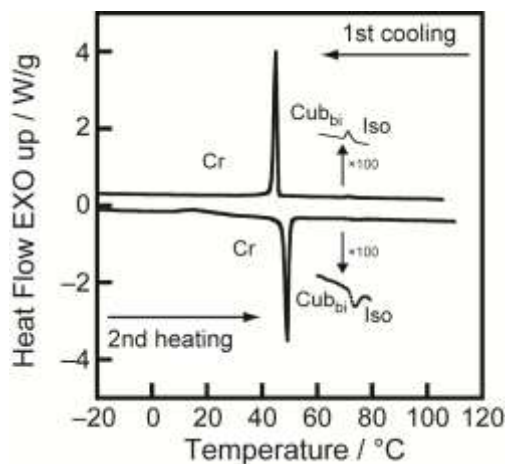

**Fig. S11** DSC thermograms of 1/[bmim][Ala] in an 8:2 molar ratio.

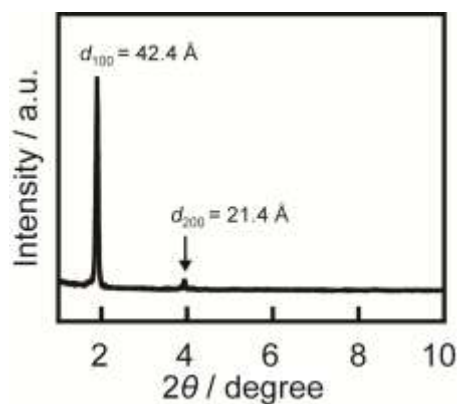

**Fig. S12** Wide angle X-ray diffraction pattern of 1/[bmim][Ala] in a 6:4 molar ratio at 60 °C in a Sm phase.

### 1/[bmim][Leu] mixtures

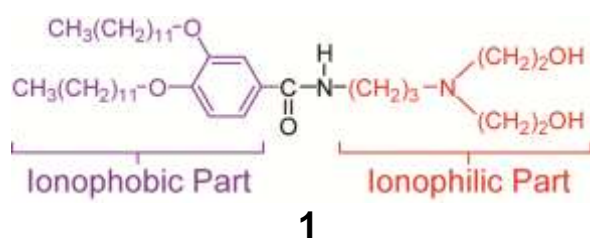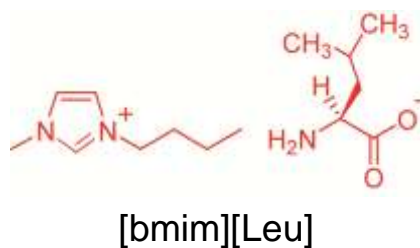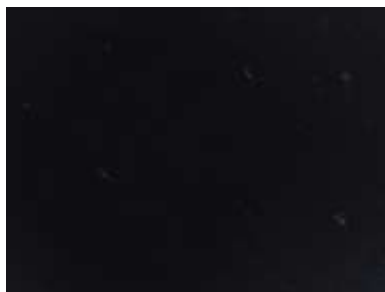

**Fig. S13** Polarizing optical images of 1/[bmim][Leu] in a 7:3 molar ratio at 50 °C in a Sm phase.

## 7. Comparison with Conventional Lyotropic Liquid-Crystalline Systems

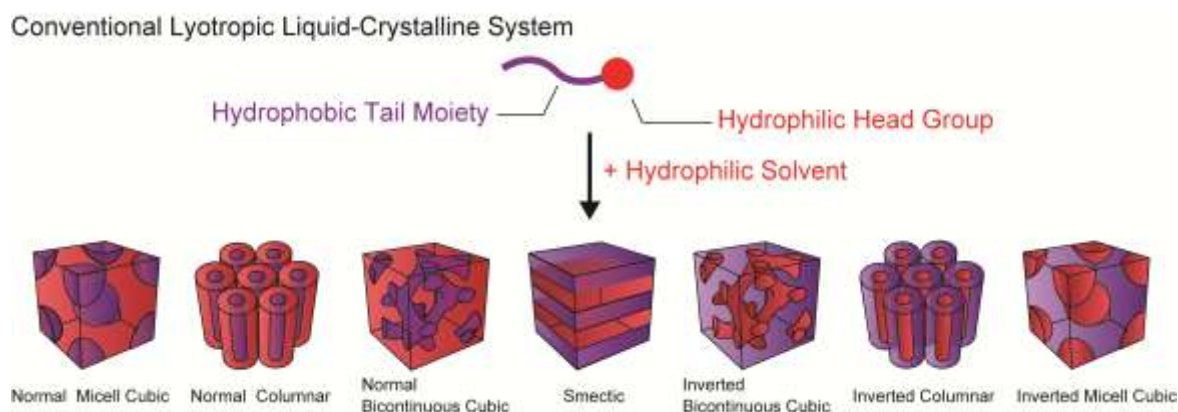

**Fig. S14** Phase sequence for conventional lyotropic liquid-crystalline systems containing hydrophilic liquid, such as water, as solvent.

## 8. Comparison of Steric Structures of Amino Acid Anions

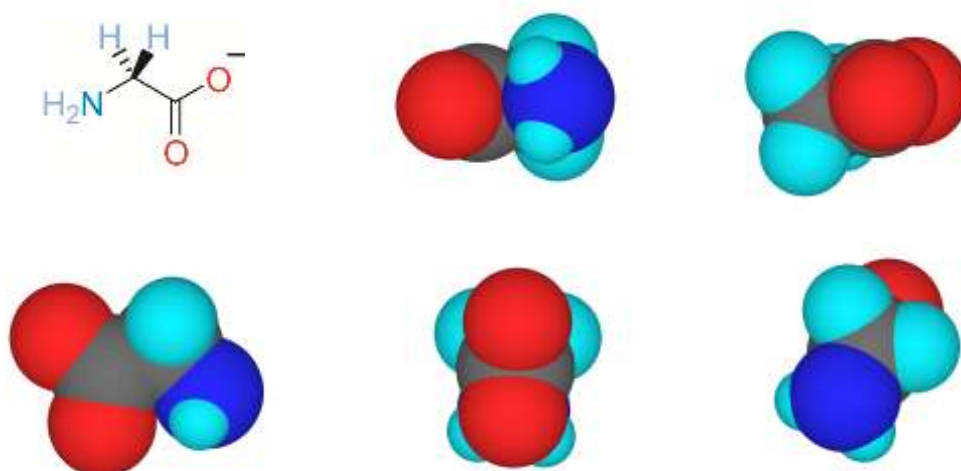

**Fig. S15** Steric structure of glycine anion viewed from a variety of angles. The hydrogen atoms are highlighted in watery blue, oxygen in red, nitrogen in blue, and carbon in gray.

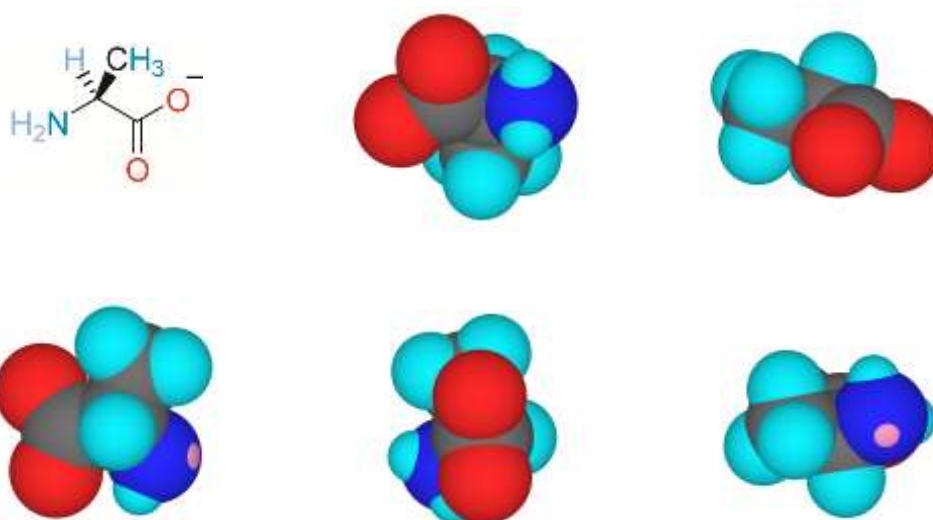

**Fig. S16** Steric structure of L-alanine anion viewed from a variety of angles. The hydrogen atoms are highlighted in watery blue, oxygen in red, nitrogen in blue, and carbon in gray.

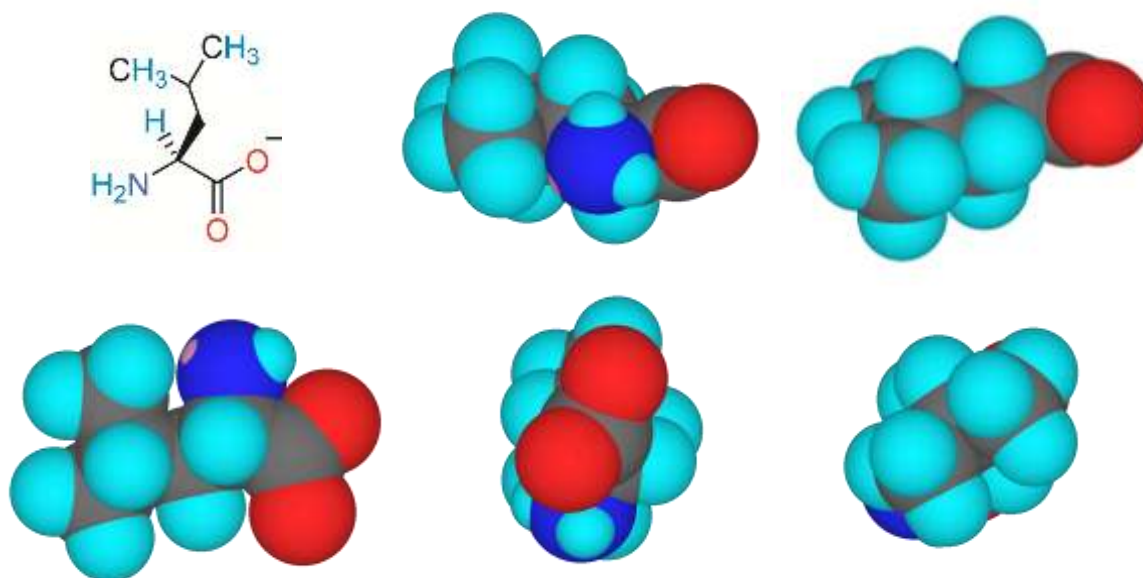

**Fig. S17** Steric structure of L-leucine anion viewed from a variety of angles. The hydrogen atoms are highlighted in watery blue, oxygen in red, nitrogen in blue, and carbon in gray.

## 8. Reference

- 1) K. Fukumoto, M. Yoshizawa and H. Ohno, *J. Am. Chem. Soc.*, 2005, **127**, 2398.
- 2) T. Ichikawa, M. Yoshio, S. Taguchi, J. Kagimoto, H. Ohno and T. Kato, *Chem. Sci.*, 2012, **3**, 2001.
